# Supplementary material for: Design of Artificial Alcohol Oxidases: Alcohol Dehydrogenase–NADPH Oxidase Fusions for Continuous Oxidations
Source: PubMed Central journal article supplement — Chembiochem. 2018 Oct 4;20(1):51–6. doi: 10.1002/cbic.201800421 (PMC6899577; doi:10.1002/cbic.201800421), 2018-10-04
Supplement: CBIC-20-51-s001.pdf [file CBIC-20-51-s001.pdf]

# CHEM**BIO**CHEM

## Supporting Information

### **Design of Artificial Alcohol Oxidases: Alcohol Dehydrogenase–NADPH Oxidase Fusions for Continuous Oxidations**

Friso S. Aalbers and Marco W. Fraaije\*<sup>[a]</sup>

cbic\_201800421\_sm\_miscellaneous\_information.pdf

## Table of Contents

| Object    | Content                                                                                | Page |
|-----------|----------------------------------------------------------------------------------------|------|
| Table S1  | List of primers                                                                        | 1    |
| Figure S1 | SDS-PAGE of cell-free extracts from all constructs                                     | 2    |
| Figure S2 | SDS-PAGE of purified fraction from all constructs                                      | 2    |
| Figure S3 | Absorbance (FAD) spectrum from ADH-NOX fusions before and after ferricyanide treatment | 3    |
| Figure S4 | Activity curves fitted with Michaelis-Menten formula – ADH activity                    | 4    |
| Figure S5 | Activity curves – NADPH oxidase activity                                               | 5    |
| Figure S6 | Chiral GC chromatograms – <i>rac</i> -1-phenylethanol conversions                      | 5    |
| Figure S7 | Colony screening assay plates – after treatment                                        | 6    |

**Table S1.** List of primers: Primers used in this study are listed in the table below. The underlined part of the sequence is the BsaI recognition site, which is incorporated to allow Golden gate cloning. Gene1 indicates the gene coding for the enzyme that would be at the N-terminus side of the fusion, whereas Gene2 would be C-terminal.

| Primer name    | Primer sequence                                      |
|----------------|------------------------------------------------------|
| Tbadh_gene1_fw | <u>CGGTCTC</u> GCCATATGAAAGGTTTCGCCATGC              |
| Tbadh_gene1_rv | <u>CGGTCTC</u> TGCAGAGCCCGAGGCCAGAATAACAACCTGG       |
| adhA_gene2_fw  | T <u>AGGTCTC</u> GCTGCAGCTGGTATGACGTCCTCCTCTTCTCC    |
| adhA_gene2_rv  | CAAT <u>GGTCTCT</u> CAAGTTAGGCGCAGTAGCCGTTGTCTG      |
| Lbadh_gene2_fw | T <u>AGGTCTC</u> GCTGCAGCTGGTATGAGCAACCGTCTAGATG     |
| Lbadh_gene2_rv | T <u>GGTCTCT</u> CAAGTTATTGTGCCGTGTAGCC              |
| Nox_gene1_fw   | <u>CGGTCTC</u> GCCATATGGCCGGGCAGACGAC                |
| Nox_gene1_rv   | <u>CGGTCTC</u> TGCAGAGCCCGAGGTGAGGACGAAACCTTCGTAGCCC |
| Nox_gene2_fw   | T <u>GGTCTC</u> GCTGCAGCTGGTATGGCCGGGCAGACGAC        |
| Nox_gene2_rv   | T <u>GGTCTCT</u> CAAGTTAGGTGAGGACGAAACCTTCGTAG       |
| QuikChange     | Primer sequence                                      |
| PAMO_C65D_fw   | GGGGGCGCGGGACGACATCGAGAG                             |
| PAMO_C65D_rv   | CTCTCGATGTCGTCCCGCGCCCC                              |
| PAMO_bsai_fw   | TGGTGTCTATCGAACAGCAC                                 |
| PAMO_bsai_rv   | ATAGACACCAGCATGTTGCTGAG                              |

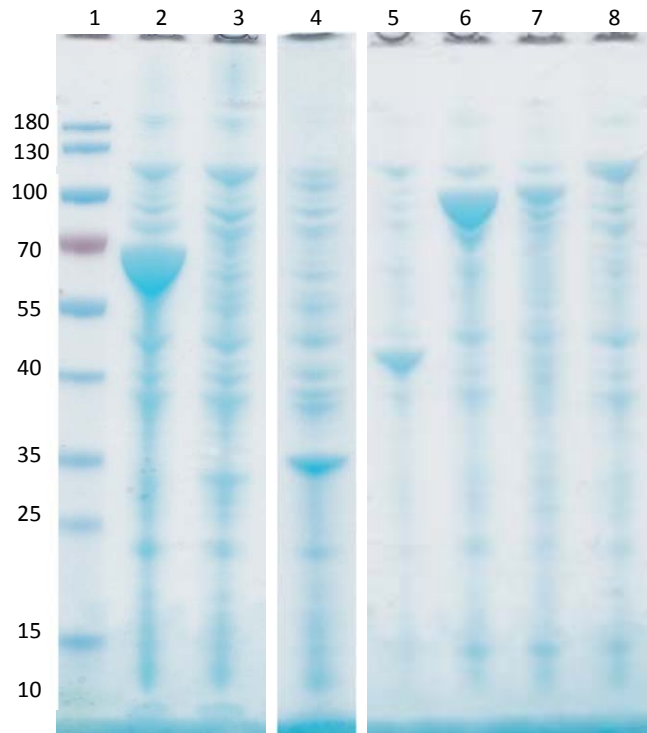

**Figure S1.** SDS-PAGE. Gel from the cell-free extract from each construct: 1. Ladder, 2. NOX, 3. ADHA, 4. LbADH, 5. TbADH, 6. NOX-A, 7. NOX-L, 8. T-NOX

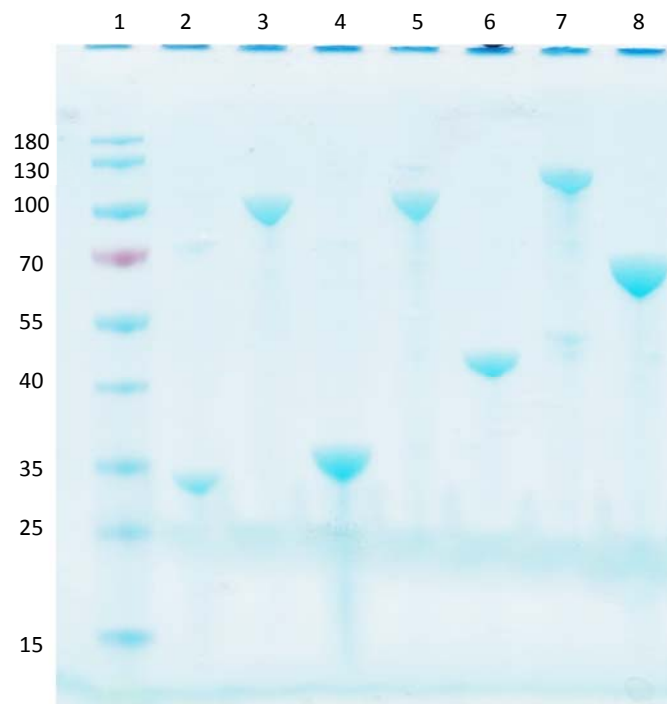

**Figure S2.** SDS-PAGE purified fractions. Gel of each purified fraction: 1. Ladder, 2. ADHA, 3. NOX-A, 4. LbADH, 5. NOX-L, 6. TbADH, 7. T-NOX, 8. NOX.

a) NOX-A before (blue) and after (green).

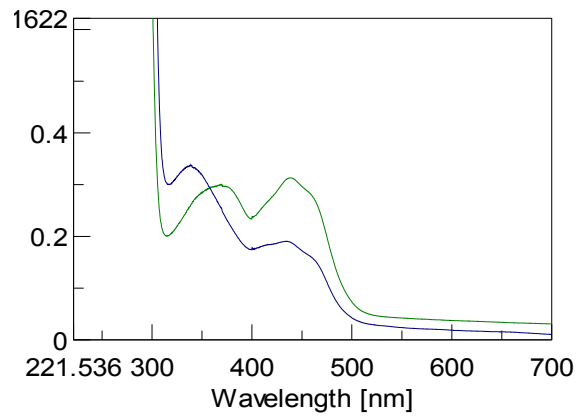

b) NOX-L before (blue) and after (green), with high and low concentration.

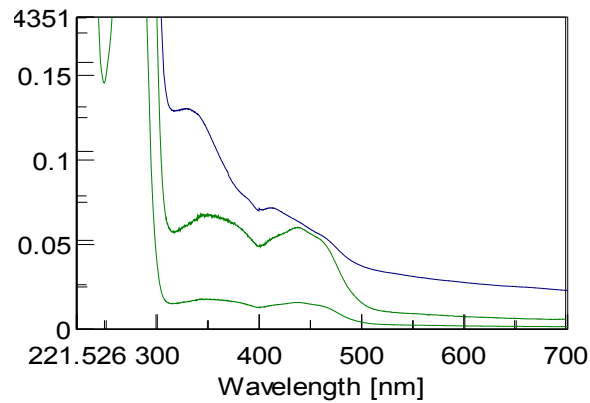

c) Tb-NOX before (green) and after (blue), with high and low concentration.

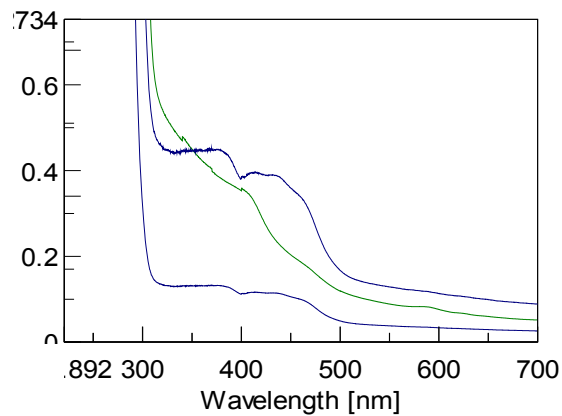

**Figure S3.** FAD spectra from NOX-ADH fusions. Absorption spectra taken from 200-700 nm, before and after treatment with ferricyanide.

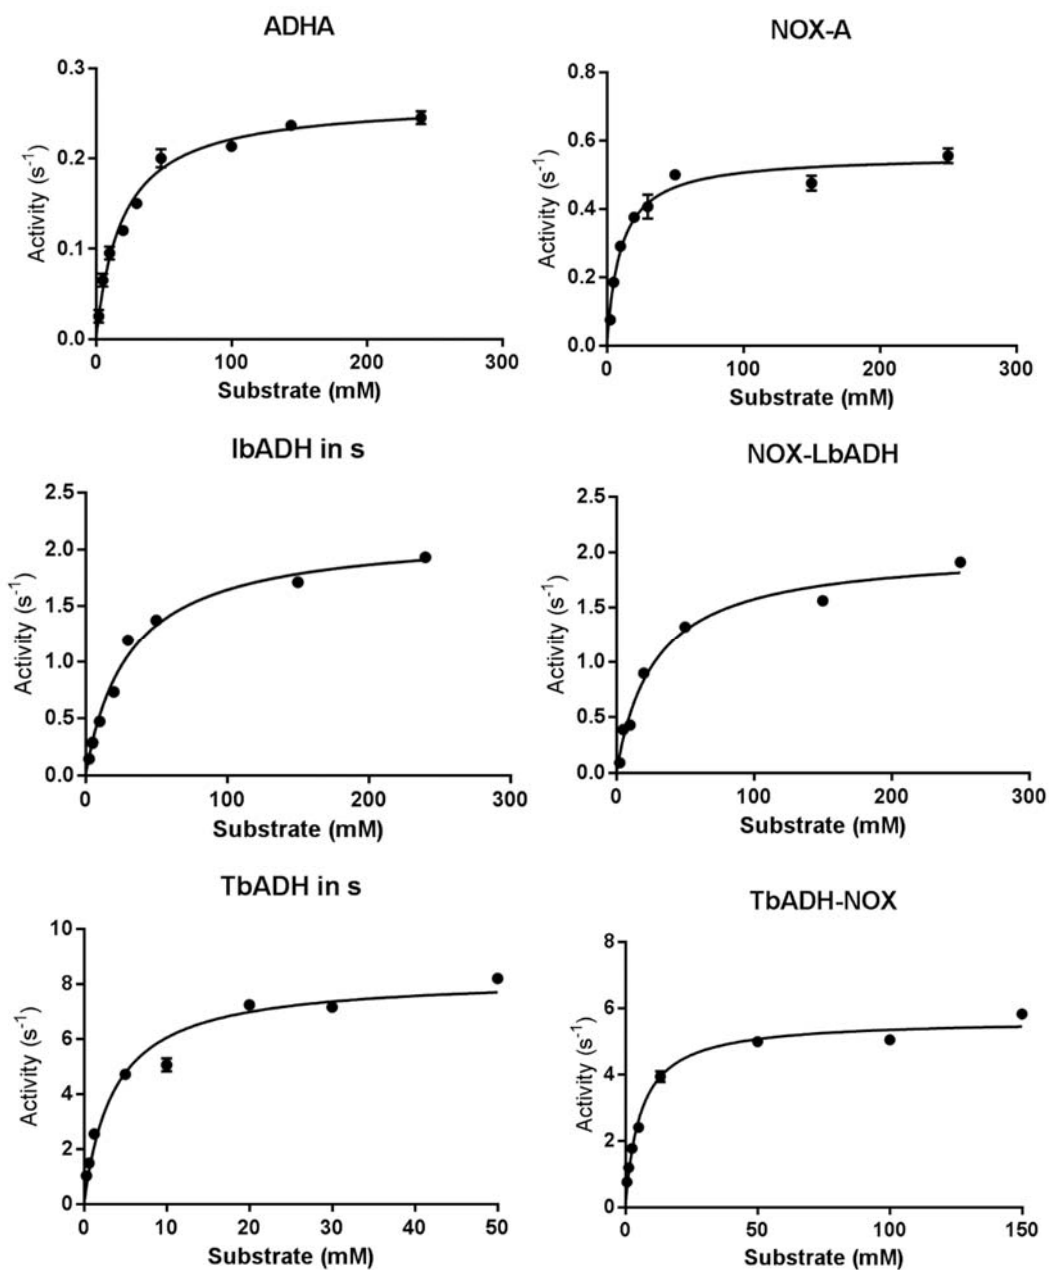

**Figure S4.** Plots of initial rates (activity, y-axis) against cyclohexanol concentration (x-axis). Reaction conditions: 25 °C, 20 mM KPO<sub>4</sub> pH 7.5, 0.2 mM NADP<sup>+</sup>, 0.01-1 μM of enzyme. Activity measurements were taken in duplicate or triplicate, with 7-10 different substrate concentrations. The data was plotted in GraphPad Prism 6, and fitted to the Michaelis-Menten equation using non-linear regression with least squares fit. Coefficient of determination ranged from  $R^2 = 0.96$  to 0.98. Kinetic values obtained are presented in Table 2.

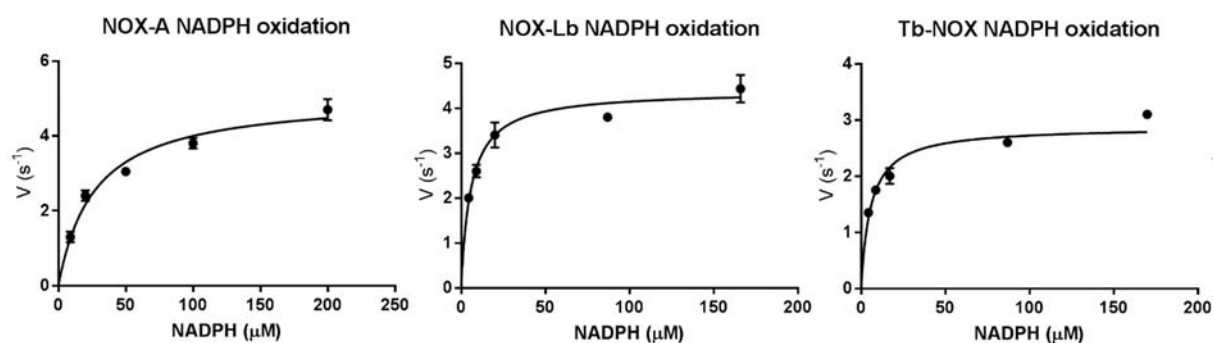

**Figure S5.** Plots of initial rates (activity, y-axis) against NADPH concentration (x-axis). Reaction conditions: 25 °C, 20 mM KPO<sub>4</sub> pH 7.5, varying concentrations of NADPH, 0.01-1 μM of fusion enzyme. Activity measurements were taken in duplicate or triplicate, with 6 different substrate concentrations. The data was plotted in GraphPad Prism 6, and fitted to the Michaelis-Menten equation using by nonlinear regression with least squares fit. Coefficient of determination: NOX-A  $R^2 = 0.96$ , NOX-L  $R^2 = 0.93$ , T-NOX  $R^2 = 0.92$ . Kinetic values obtained are presented in Table 2.

a) NOX-A chromatogram (94% conversion)

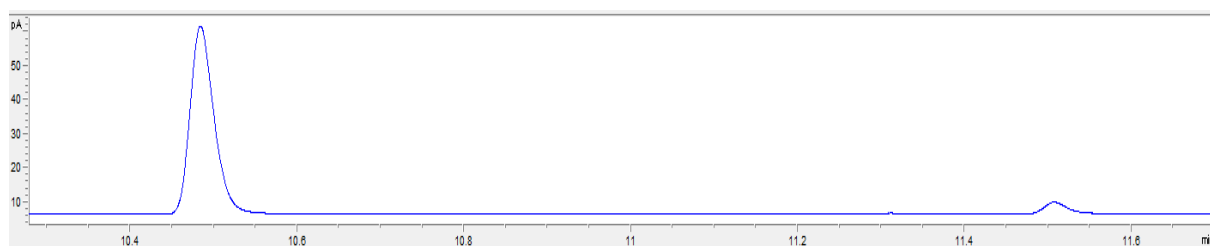

b) NOX-L chromatogram (50% conversion)

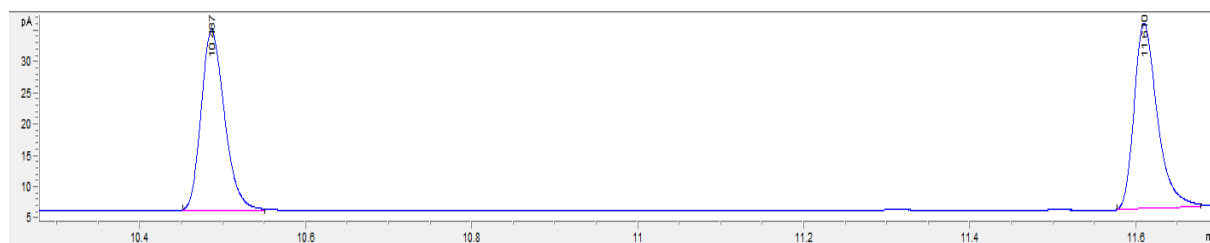

c) Control rac-1-phenylethanol

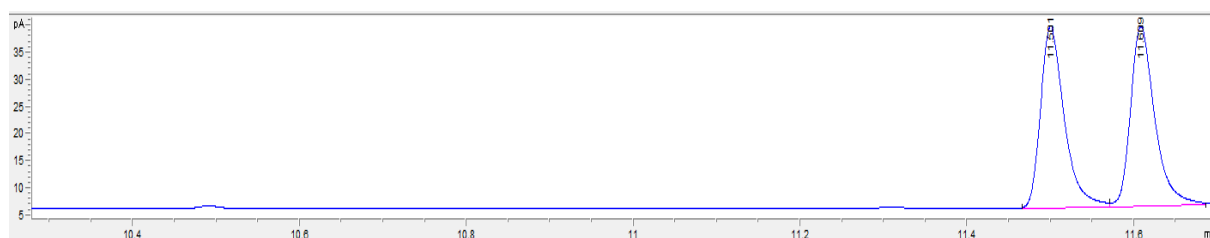

**Figure S6** Chiral GC analysis. Results from kinetic resolution. Samples were extracted with ethyl acetate, dried over magnesium sulfate, and analyzed by chiral GC (Hydrodex β-TBDAC column (Aurora Borealis, The Netherlands)). The retention times were: acetophenone (10.5 min), (R)-1-phenylethanol (11.5 min), (S)-1-phenylethanol (11.6 min).

a)

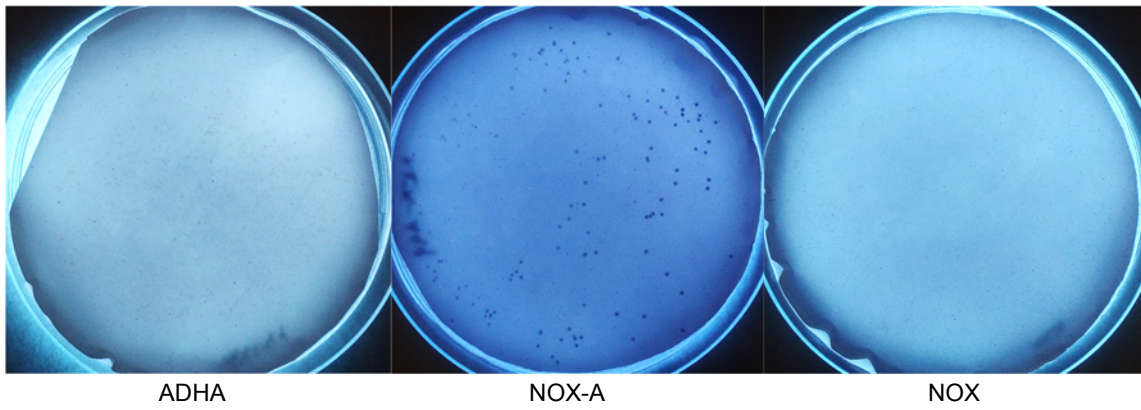

b)

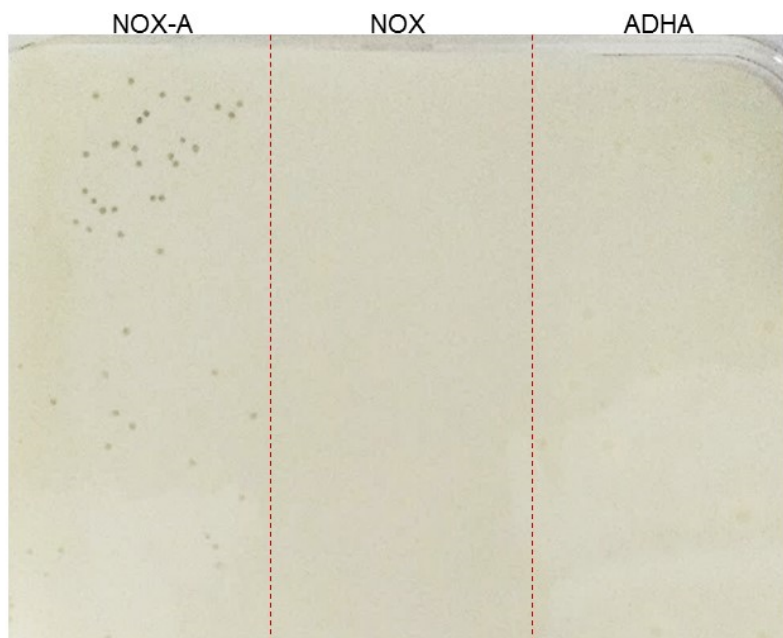

**Figure S7:** Colony-based oxidase screening. a) Colonies expressing: ADHA (left), NOX-A (middle), NOX (right), then treated with assay mix (see experimental section). b) Replicate, with the three constructs on the same plate, plated in separate lanes (red striped lines).
